# Supplementary material for: Highly Expressed FOXF1 Inhibit Non-Small-Cell Lung Cancer Growth via Inducing Tumor Suppressor and G1-Phase Cell-Cycle Arrest
Source: MDPI journal article supplement (doi:10.3390/ijms21093227), 2020-05-02
Supplement: s1 [file s1]

| Characteristics                       | No. of patients | Relative FOXF1 expression (Mean $\pm$ SEM) | P-value |
|---------------------------------------|-----------------|--------------------------------------------|---------|
| <b>Gender</b>                         |                 |                                            | 0.1655  |
| Male                                  | 24              | 0.070 $\pm$ 0.031                          |         |
| Female                                | 17              | 0.025 $\pm$ 0.005                          |         |
| <b>Age (y)</b>                        |                 |                                            | 0.4031  |
| $\leq 65$                             | 20              | 0.036 $\pm$ 0.006                          |         |
| $> 65$                                | 21              | 0.066 $\pm$ 0.035                          |         |
| <b>Histopathology</b>                 |                 |                                            | 0.1457  |
| Adenocarcinoma                        | 22              | 0.058 $\pm$ 0.034                          |         |
| Squamous cell carcinoma               | 13              | 0.053 $\pm$ 0.010                          |         |
| Large cell carcinoma                  | 6               | 0.024 $\pm$ 0.005                          |         |
| <b>Histologic grade</b>               |                 |                                            | 0.3753  |
| Well differentiated (G1)              | 3               | 0.018 $\pm$ 0.006                          |         |
| Moderately differentiated (G2)        | 13              | 0.034 $\pm$ 0.009                          |         |
| Poorly differentiated (G3)            | 18              | 0.073 $\pm$ 0.041                          |         |
| Unknown                               | 7               | 0.044 $\pm$ 0.013                          |         |
| <b>Primary Tumor (T-stage)</b>        |                 |                                            | 0.8337  |
| T1                                    | 9               | 0.043 $\pm$ 0.013                          |         |
| T2                                    | 17              | 0.030 $\pm$ 0.005                          |         |
| T3                                    | 7               | 0.144 $\pm$ 0.103                          |         |
| T4                                    | 6               | 0.027 $\pm$ 0.007                          |         |
| Tx                                    | 2               | 0.018 $\pm$ 0.001                          |         |
| <b>Regional Lymph Nodes (N-stage)</b> |                 |                                            | 0.4063  |
| N0                                    | 20              | 0.076 $\pm$ 0.037                          |         |
| N1                                    | 10              | 0.024 $\pm$ 0.006                          |         |
| N2                                    | 7               | 0.039 $\pm$ 0.009                          |         |
| N3                                    | 1               | 0.019                                      |         |
| Nx                                    | 3               | 0.020 $\pm$ 0.003                          |         |
| <b>Overall stage</b>                  |                 |                                            | 0.9648  |
| I                                     | 11              | 0.038 $\pm$ 0.010                          |         |
| II                                    | 13              | 0.089 $\pm$ 0.056                          |         |
| III                                   | 14              | 0.031 $\pm$ 0.006                          |         |
| IV                                    | 3               | 0.033 $\pm$ 0.008                          |         |

**Supplementary Table 1.** Patient demographic and clinicopathological characteristics.

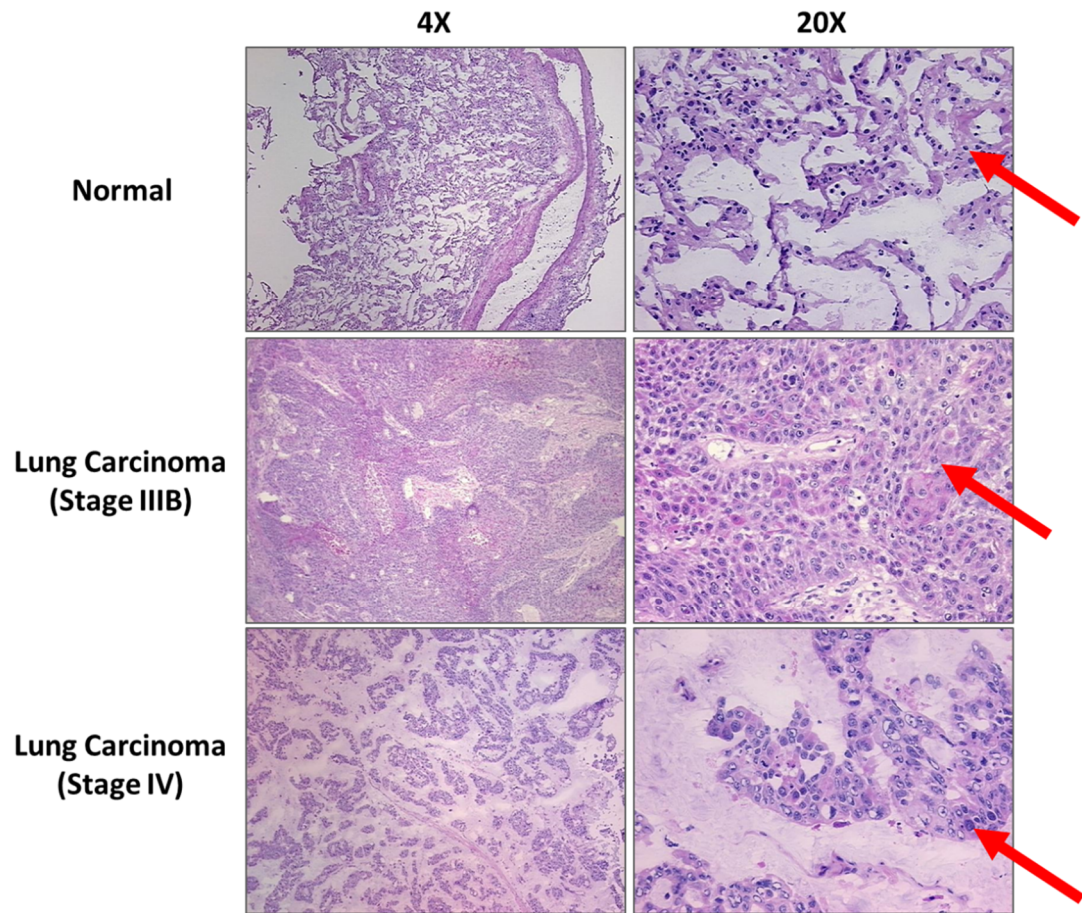

**Supplementary Figure 1.** Representative lung tissue sections (H&E stain) of normal lung and lung carcinoma (Stage III and IV). Images are captured at 4X and 20X magnification. The data are provided from Origene company (<https://www.origene.com/catalog/tissues/tissuescan/hlrt105/tissuescan-lung-cancer-cdna-array-v>)

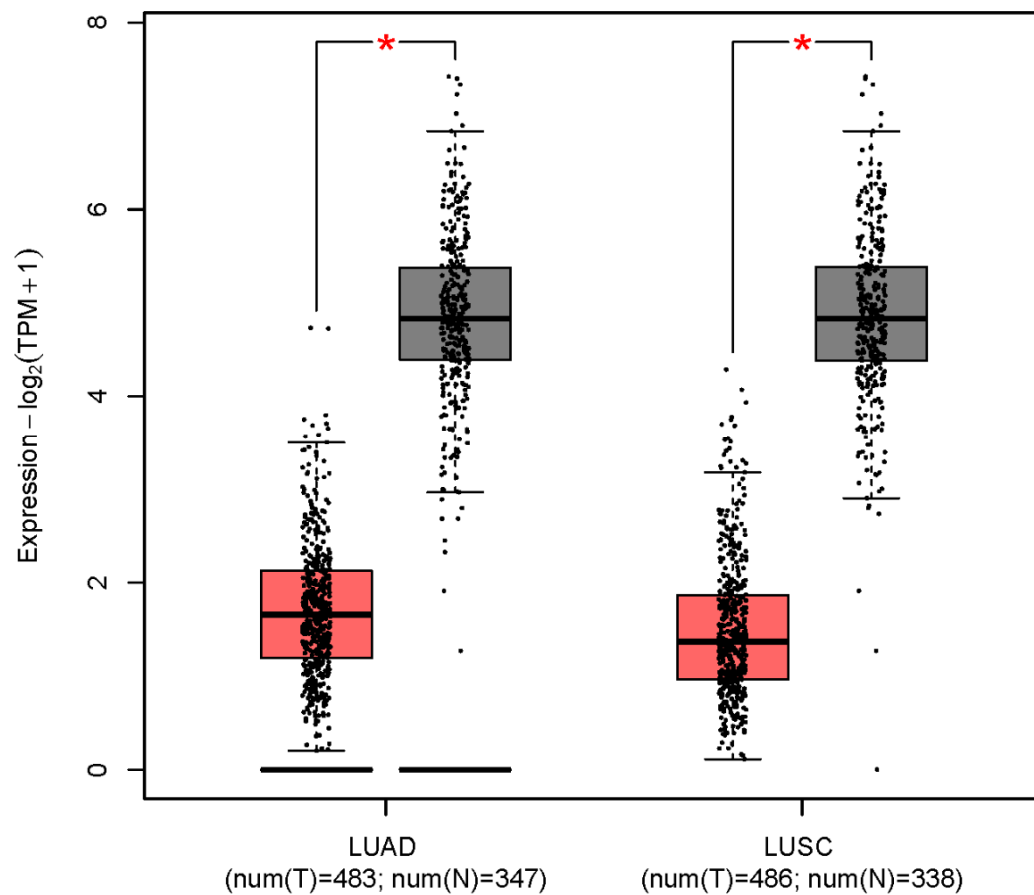

**Supplementary Figure 2.** *In silico* analysis of FOXF1 expression profiles from The Cancer Genome Atlas (TCGA) and genotype-tissue expression (GTEx) projects using GEPIA2 online platform (<http://gepia2.cancer-pku.cn/#index>). The FOXF1 expression of lung adenocarcinoma (LUAD) and lung squamous cell carcinoma (LUSC) are represented as box plot, and *p-value* cutoff is set at 0.05.
